# Supplementary material for: Development of anti-somatostatin receptors CAR T cells for treatment of neuroendocrine tumors
Source: PubMed Central journal article supplement — J Immunother Cancer. 2022 Jun 28;10(6):e004854. doi: 10.1136/jitc-2022-004854 (PMC9240886; doi:10.1136/jitc-2022-004854), 2022-06-28
Supplement: jitc-2022-004854supp001.pdf [file jitc-2022-004854supp001.pdf]

**Supplementary Table 1 – Primers and probe sequences.**

| Target                                                                                                                                                                                  | Sequence (5'-3')                                    |
|-----------------------------------------------------------------------------------------------------------------------------------------------------------------------------------------|-----------------------------------------------------|
| CAR                                                                                                                                                                                     | F: TTTTGGACAAGAGACGTGGC<br>R: CCTTGGTGGCTGTACTGAGA  |
| SSTR2_737                                                                                                                                                                               | F: CCTAAGACTGAAAAGCAGCCAT                           |
| SSTR2_723                                                                                                                                                                               | R: CCTAAGACTGAAAAGCAGCCAT                           |
| SSTR5_1600                                                                                                                                                                              | F: TTCTTCTCTTGCAGAGCCTGA                            |
| SSTR5_1616                                                                                                                                                                              | R: GACTGTCAGGCAGAAGACACTG                           |
| sgRNA_SSTR2                                                                                                                                                                             | F: CATGAGCATCGACCGATAACC<br>R: TTGCTTGTCAGGTCATAGTA |
| sgRNA_SSTR5                                                                                                                                                                             | F: GAACACGCTGGTCATCTACG<br>R: CGCAGAACGCCGCGTCCTTC  |
| CAR-FAM probe                                                                                                                                                                           | Bio-Rad Id: dCNS496782297*                          |
| MKL2-HEX probe                                                                                                                                                                          | Bio-Rad Id: dHsaCNS879832622**                      |
| *MIQE [46] context provided at <a href="https://www.bio-rad.com/digital-assays/assay-detail/dCNS496782297">https://www.bio-rad.com/digital-assays/assay-detail/dCNS496782297</a>        |                                                     |
| **MIQE [46] context provided at <a href="https://www.bio-rad.com/digital-assays/assay-detail/dHsaCNS879832622">https://www.bio-rad.com/digital-assays/assay-detail/dHsaCNS879832622</a> |                                                     |

### References

1. Bustin SA, Benes V, Garson JA, Hellemans J, Huggett J, Kubista M *et al.* The MIQE Guidelines: Minimum Information for Publication of Quantitative Real-Time PCR Experiments. *Clin Chem.* **2009**; 55(4):611-22.
