# Supplementary figures and images for: Development of anti-somatostatin receptors CAR T cells for treatment of neuroendocrine tumors
Source: PubMed Central journal article supplement — J Immunother Cancer. 2022 Jun 28;10(6):e004854. doi: 10.1136/jitc-2022-004854 (PMC9240886; doi:10.1136/jitc-2022-004854), 2022-06-28

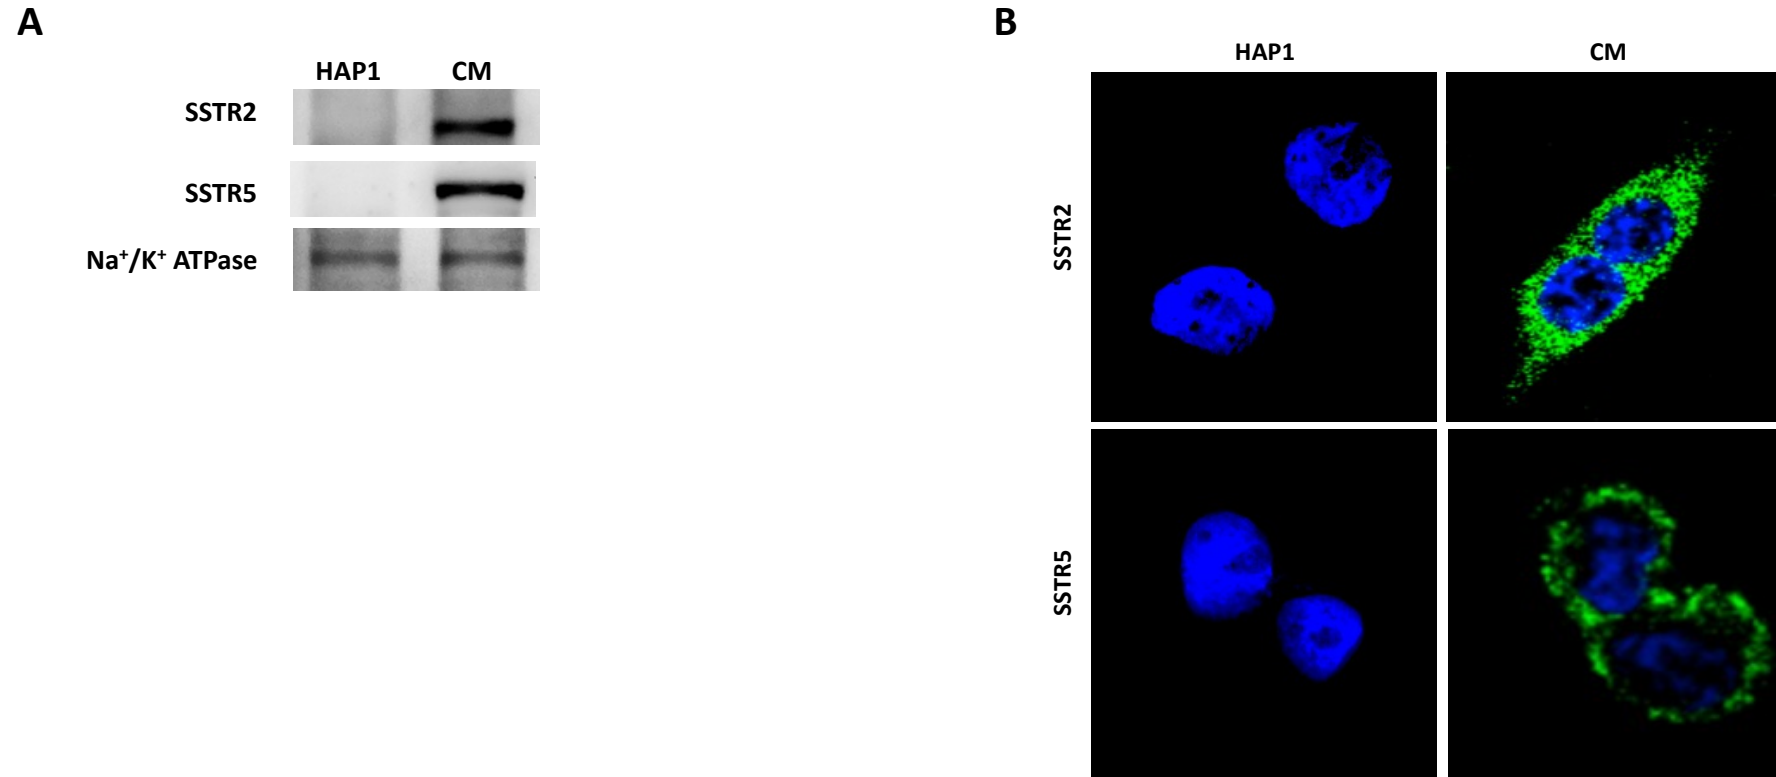

Supplementary Figure 1

Supplement: jitc-2022-004854supp003.pdf [file jitc-2022-004854supp003.pdf]

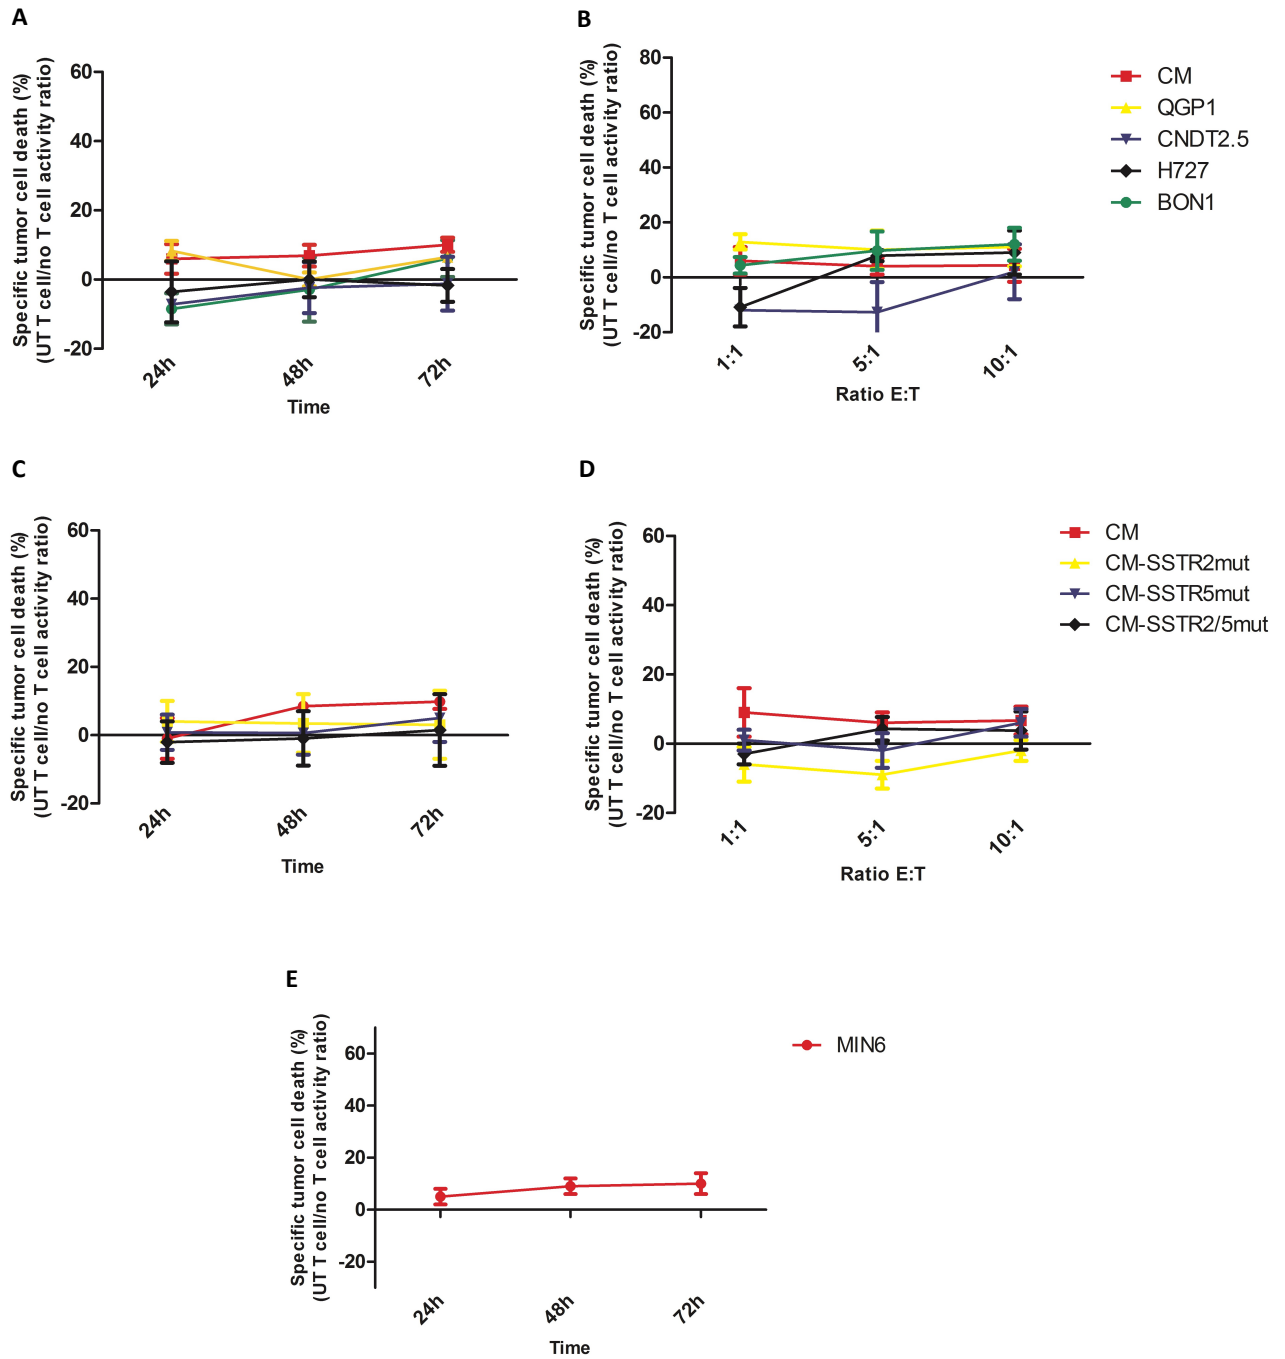

Supplementary Figure 2

Supplement: jitc-2022-004854supp004.pdf [file jitc-2022-004854supp004.pdf]

A

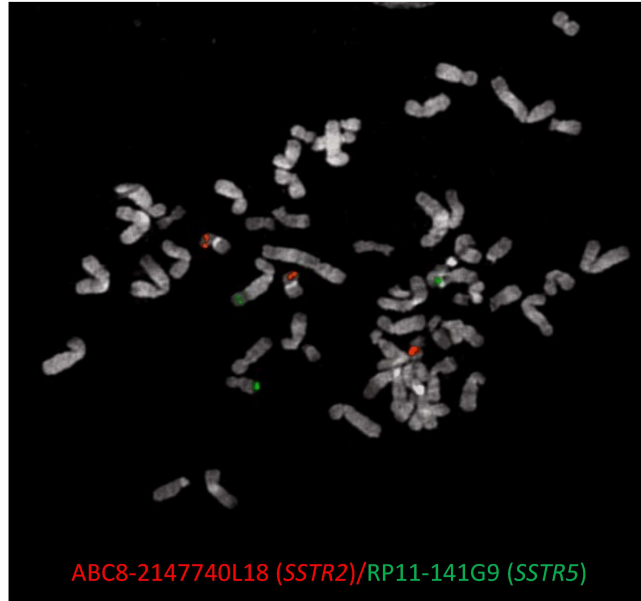

B

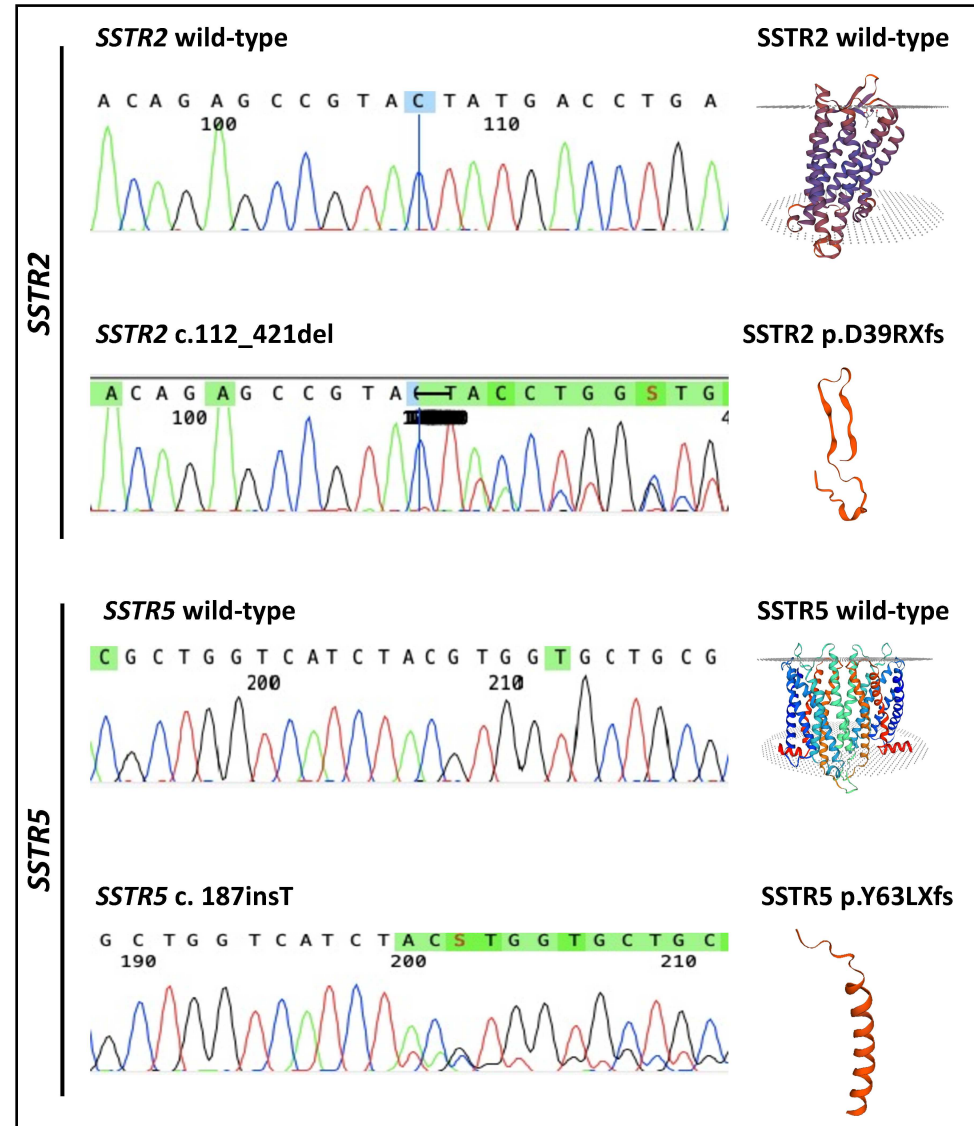

C

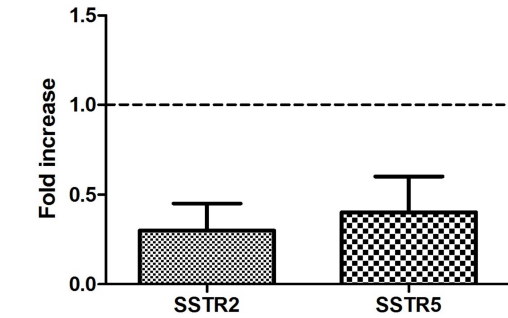

D

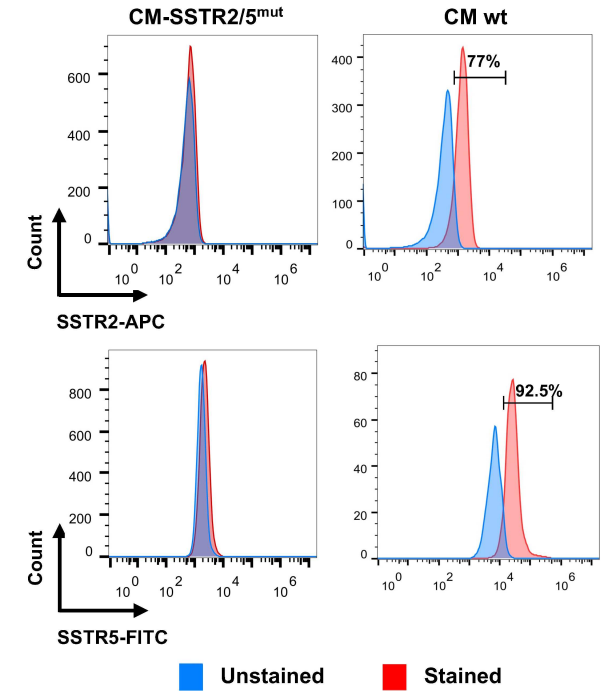

Supplementary Figure 3

Supplement: jitc-2022-004854supp005.pdf [file jitc-2022-004854supp005.pdf]

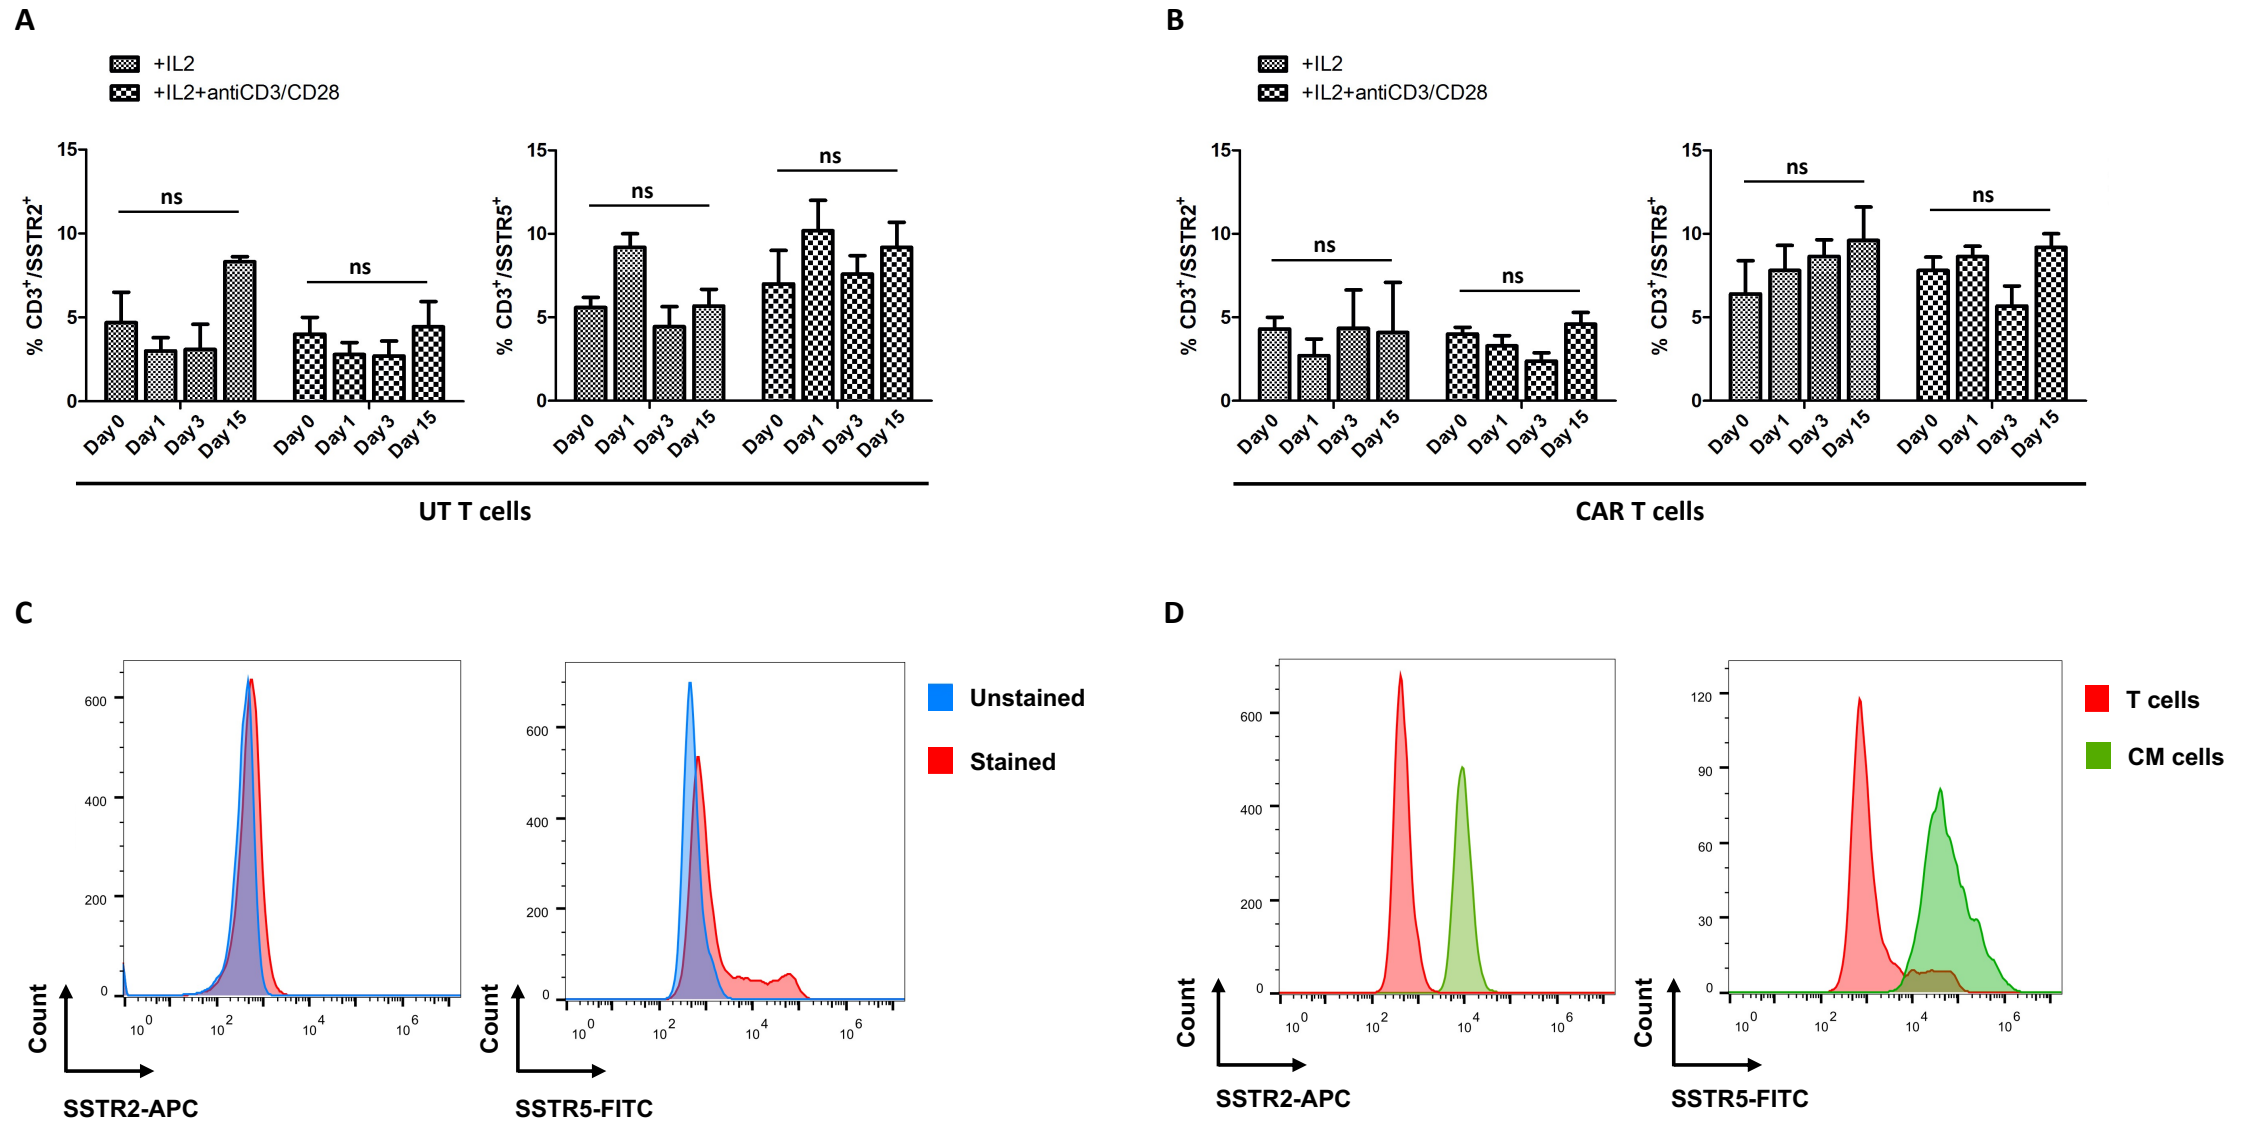

Supplementary Figure 4

Supplement: jitc-2022-004854supp006.pdf [file jitc-2022-004854supp006.pdf]

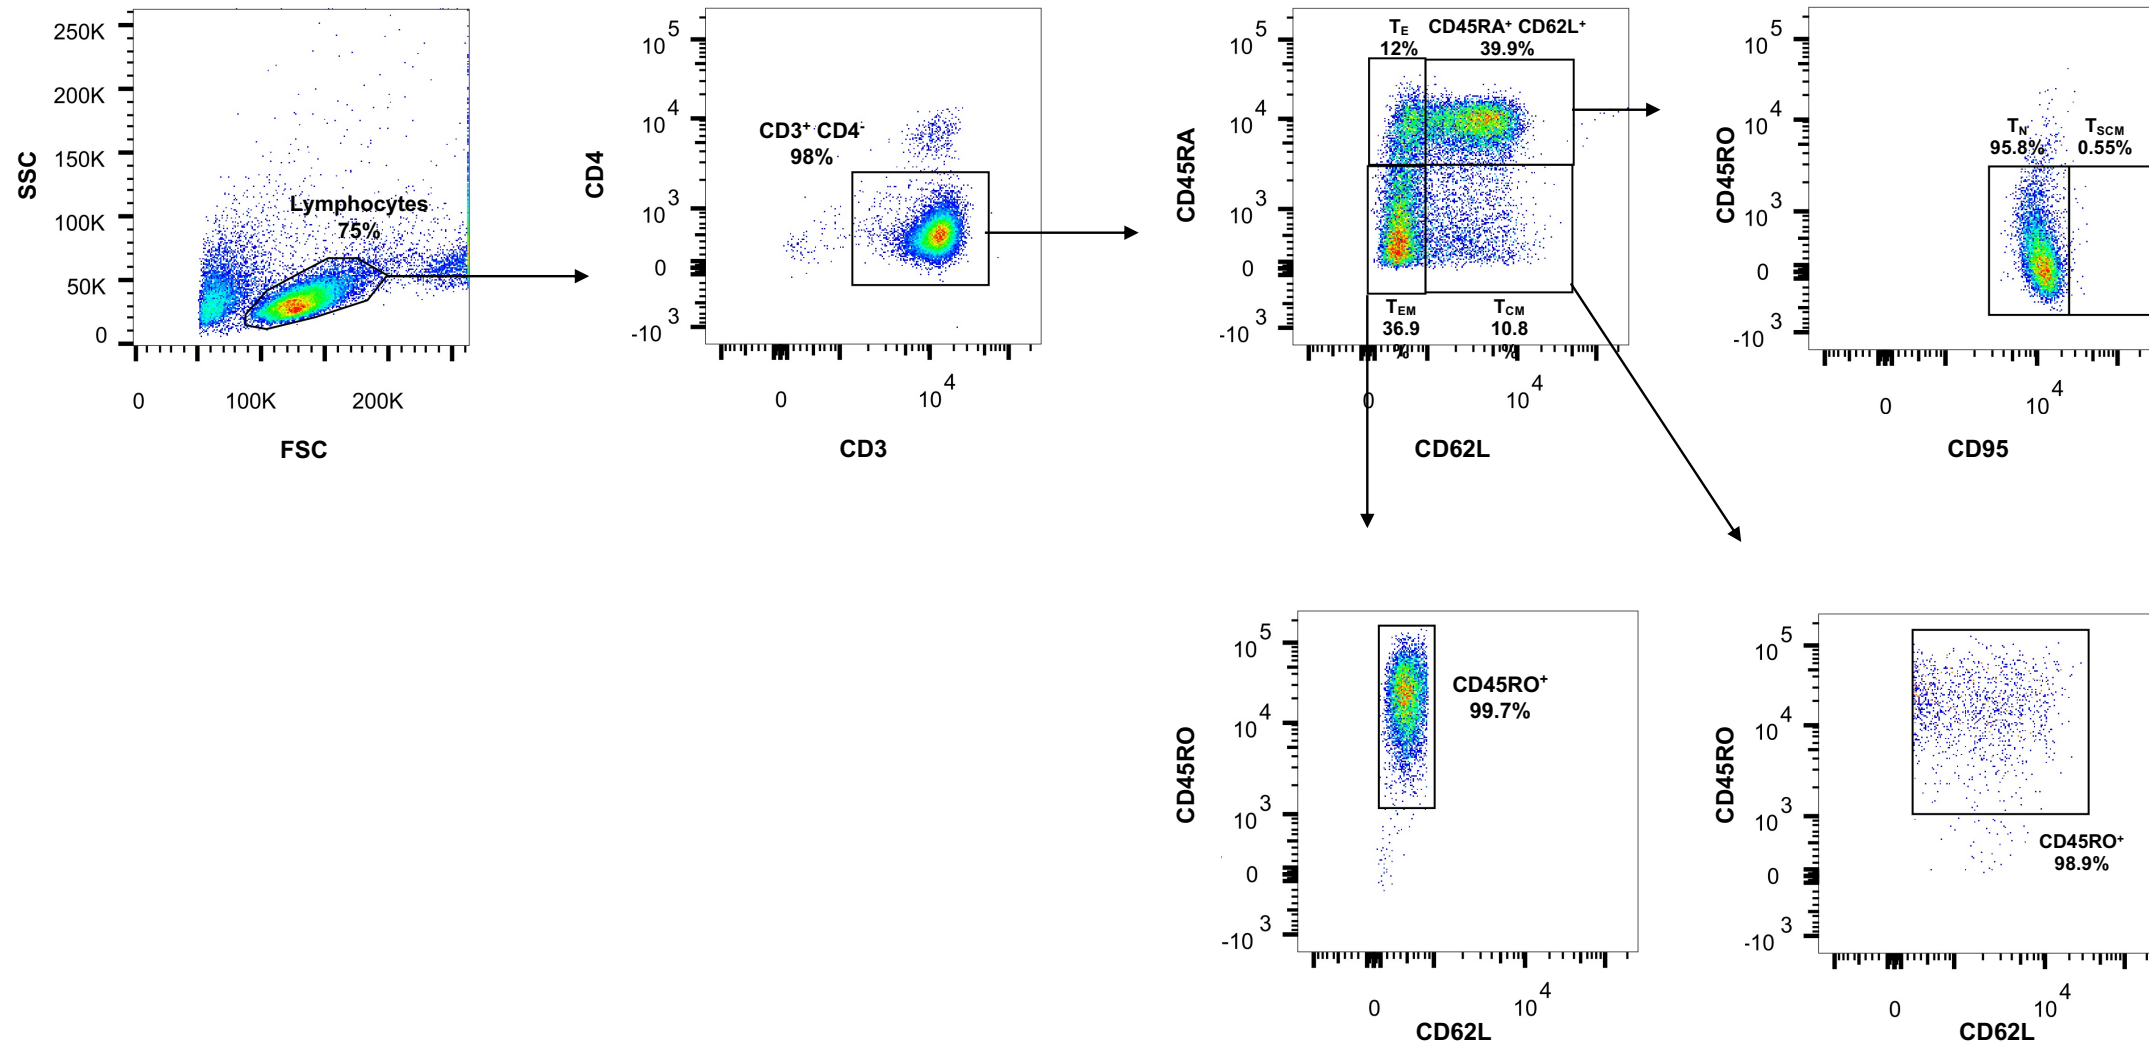

Supplementary Figure 5

Supplement: jitc-2022-004854supp007.pdf [file jitc-2022-004854supp007.pdf]

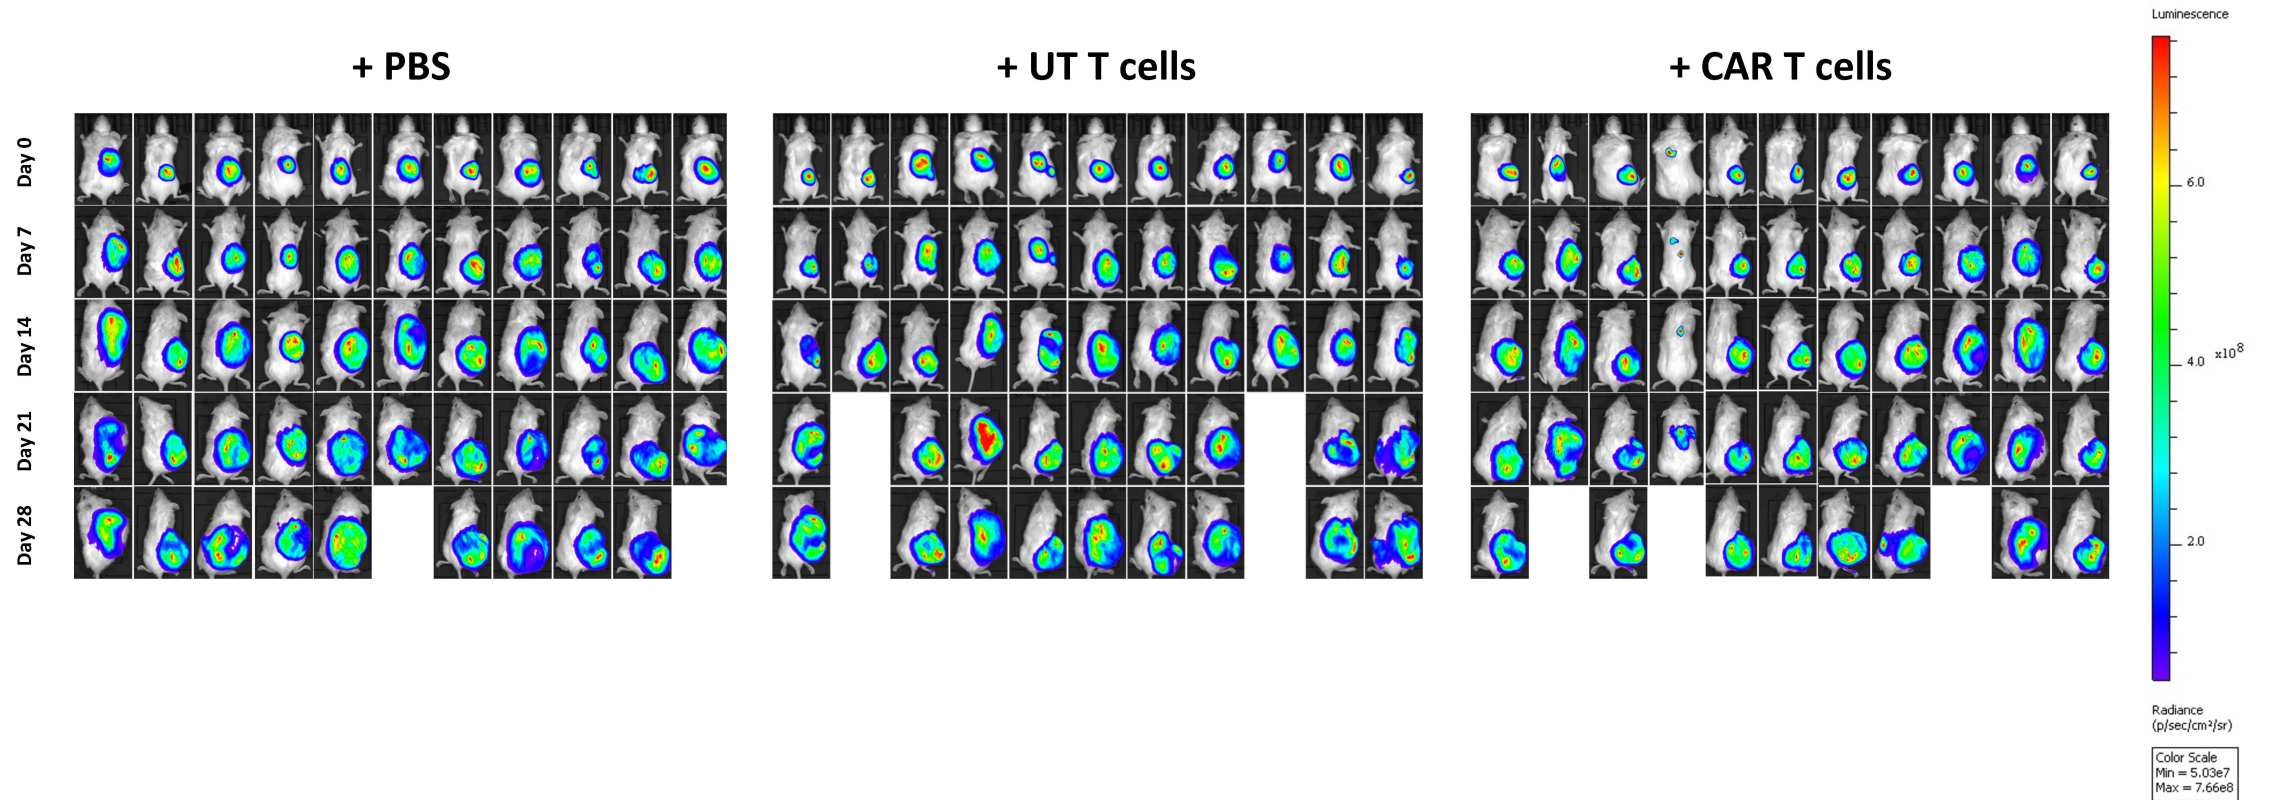

Supplementary Figure 6

Supplement: jitc-2022-004854supp008.pdf [file jitc-2022-004854supp008.pdf]

A

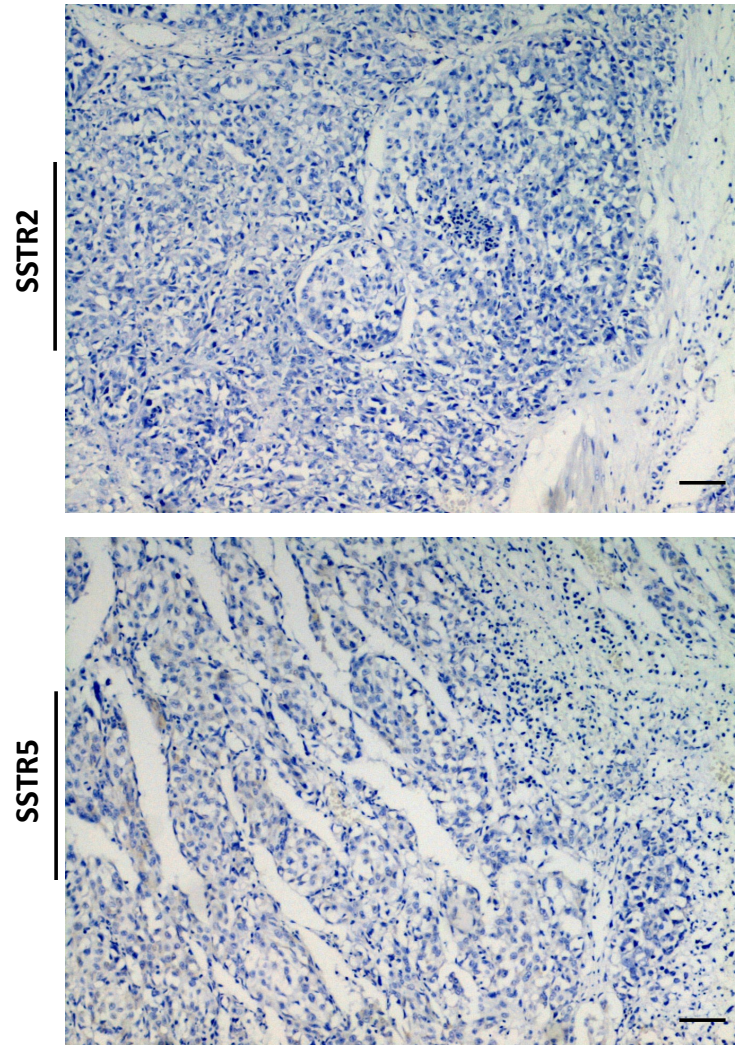

B

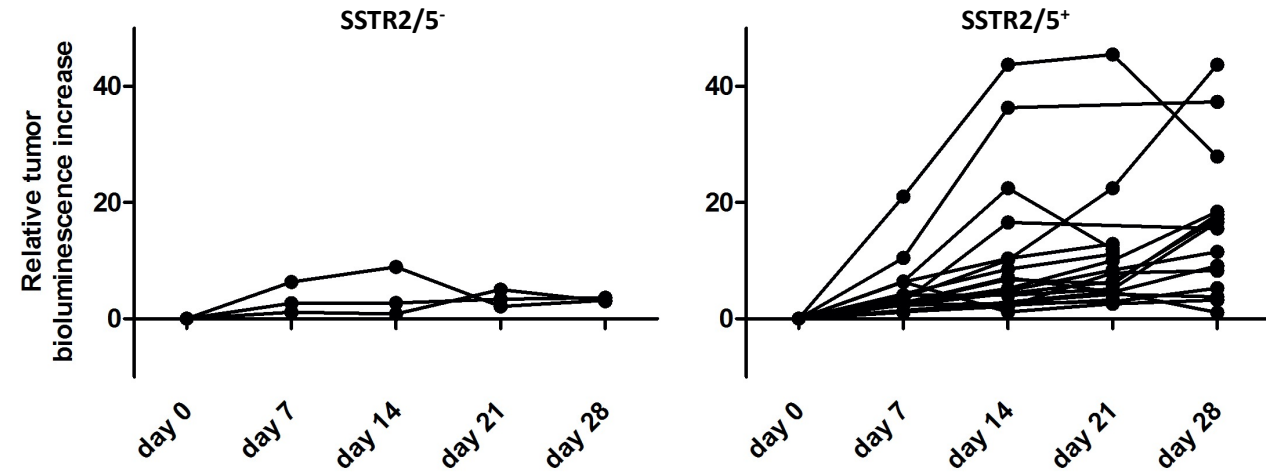

C

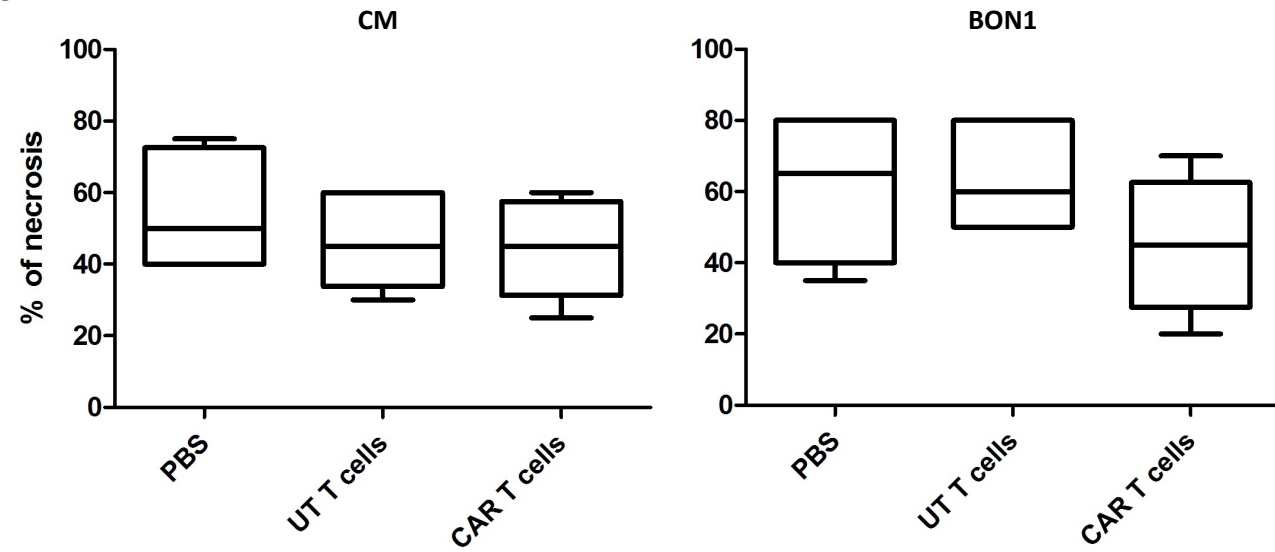

Supplementary Figure 7

Supplement: jitc-2022-004854supp009.pdf [file jitc-2022-004854supp009.pdf]
